# Supplementary material for: Omega-3 Polyunsaturated Fatty Acids Prevent Toxoplasma gondii Infection by Inducing Autophagy via AMPK Activation
Source: MDPI journal article supplement (doi:10.3390/nu11092137), 2019-09-06

1 **Omega-3 Polyunsaturated Fatty Acids Prevent *Toxoplasma gondii* Infection by**  
2 **Inducing Autophagy via the AMPK activation.**

3

4 Running title:  $\omega$ 3-PUFAs restrict *T. gondii* growth via autophagy

5

6 Jae-Won Choi<sup>1,2,3¶</sup>, Jina Lee<sup>1,2,3¶</sup>, Jae-Hyung Lee<sup>1,2,3</sup>, Byung-Joon Park<sup>1,2,3</sup>, Eun Jin  
7 Lee<sup>1,2,3</sup>, Soyeon Shin<sup>4</sup>, Guang-Ho Cha<sup>1,2</sup>, Young-Ha Lee<sup>1,2</sup>, Kyu Lim<sup>4\*</sup>, Jae-Min Yuk<sup>1,2,3\*</sup>

8

9 <sup>1</sup>Department of Infection Biology, College of Medicine, Chungnam National University,  
10 Daejeon, Korea; <sup>2</sup>Department of Medical Science, College of Medicine, Chungnam  
11 National University, Daejeon, Korea; <sup>3</sup>Infection Control Convergence Research Center,  
12 College of Medicine, Chungnam National University, Daejeon, Korea; <sup>4</sup>Department of  
13 Biochemistry, College of Medicine, Chungnam National University, Daejeon, Korea.

14

15 **Supplemental Materials and methods**

16 **Cell count kit (CCK) 8 assay**

17       The cytotoxicity effects of herbal extracts on BMDMs were determined using CCK8 assay  
18 (Dojindo Molecular Technologies, CK04-11) according to manufacturer's protocol. Briefly,  
19 BMDMs were seeded in 96well plates and differentiated with M-CSF for 5 days as described in  
20 cell preparation. Cells were replaced with serum-free media and then incubated with various  
21 DHA for 18 hours. Then, 10  $\mu$ l of the CCK-8 solution was added and incubated for 1 hours at  
22 37°C. Absorbance was measured at 450 nm using a microplate reader (SPECTRO star Nano,  
23 BMG Labtech, Ortenberg, Germany). The Optical density (OD) of supernatants for each treated  
24 well was calculated by dividing the average OD from control wells and quantified values of cell  
25 viability were obtained.

26

27 **Supplemental Figures**

28

29 **Fig S1. Cytotoxic effects of DHA in BMDMs.** BMDMs were treated with different  
30 concentrations of DHA (5 - 500  $\mu$ M) for 18 hours, and cell viability was evaluated using  
31 CCK-8 assay. Quantitative data for cell viability are representative of three independent  
32 experiments and are presented as means  $\pm$  SD. **\*\* $P$  < 0.01, \*\*\* $P$  < 0.001** (two-tailed  
33 Student's t-test), compared with SC-treated cells. SC, vehicle control (0.01% DMSO).

**Figure S1. Choi *et al.***

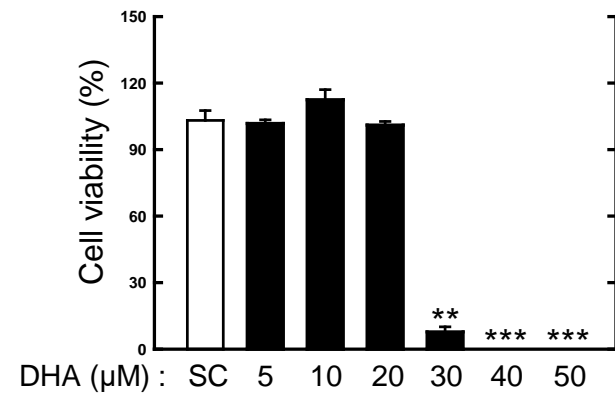

Supplement: s1 [file s1]
